# Supplementary material for: Three-dimensional imaging for precise structural control of Si quantum dot networks for all-Si solar cells
Source: Royal Society of Chemistry journal article supplement (doi:10.1039/c3nr01998e), 2013-01-01
Supplement: c3nr01998e.pdf [file c3nr01998e.pdf]

**Supporting materials** for “Three-dimensional imaging for precise structural control of Si quantum dot networks for all-Si solar cells” by Lena F. Kourkoutis, Xiaojing Hao, Shujuan Huang, Binesh Puthen-Veettil, Gavin Conibeer, Martin Andrew Green, Ivan Perez-Wurfl

***Movie S1-S3:***

Movies of the tomographic reconstructions of Si QD networks formed during annealing of  $\text{SiO}_{1.3}/\text{SiO}_2$  (Movie S1),  $\text{SiO}_{1.0}/\text{SiO}_2$  (Movie S2) and  $\text{SiO}_{0.86}/\text{SiO}_2$  (Movie S3) multilayers. Snapshots of these movies are shown in Fig. 2.
